# Supplementary material for: NO2-sensing performance of SnO2 microrods by functionalization of Ag nanoparticles
Source: Royal Society of Chemistry journal article supplement (doi:10.1039/c3tc00602f), 2013-01-01
Supplement: c3tc00602f.pdf [file c3tc00602f.pdf]

## Supplementary Information; Figures and Table

**Table S1.** Comparison of the NO<sub>2</sub> sensing capability of the Ag-functionalized SnO<sub>2</sub> microrods in this study to those of the previous reports.

**Fig. S1** Microstructures of Ag nanoparticles synthesized with different AgNO<sub>3</sub> concentrations in  $\gamma$ -ray radiolysis at 10 kGy·h<sup>-1</sup> for 2 h: (a)  $2 \times 10^{-2}$ , (b)  $2 \times 10^{-3}$  and (c)  $2 \times 10^{-4}$  mM AgNO<sub>3</sub> in a mixed solvent of deionized water (90 vol%) and 2-propanol (10 vol%).

**Fig. S2** (a) Size and (b) formation density of Ag nanoparticles as a function of the precursor concentration in  $\gamma$ -ray radiolysis at 10 kGy·h<sup>-1</sup> for 2 h.

**Fig. S3** (a) X-ray photoelectron spectroscopy spectrum of the Ag-functionalized SnO<sub>2</sub> microrods after the heat treatment. (b) A high resolution spectrum for the Ag 3d<sub>5/2</sub> signal.

**Fig. S4** Response curves of the sensors fabricated with bare and Ag-functionalized SnO<sub>2</sub> microrods for 1 ppm NO<sub>2</sub> at 300 °C during the repeated cycles.

**Fig. S5** Low- and high-resolution TEM images taken from single SnO<sub>2</sub> microrod. The inset in the upper figure is an electron diffraction pattern taken from the microrod.

**Fig. S6** Comparison of the response of the sensor fabricated with the Ag-functionalized SnO<sub>2</sub> microrods to those of previously reported sensors that were fabricated with different types of SnO<sub>2</sub> materials.

**Fig. S7** Response curves of the Ag-functionalized SnO<sub>2</sub> microrods for 100 ppm CO, C<sub>6</sub>H<sub>6</sub> and C<sub>7</sub>H<sub>8</sub> at 200 °C.

**Fig. S8** Energy band diagrams of the junctions (a) *p*-Ag<sub>2</sub>O and *n*-SnO<sub>2</sub> and (b) Ag and *n*-SnO<sub>2</sub>.

**Table S1.** Comparison of the NO<sub>2</sub> sensing capability of the Ag-functionalized SnO<sub>2</sub> microrods in this study to those of the previous reports.

| Materials                                                 | NO <sub>2</sub><br>concentration<br>(ppm) | Operating<br>temperature<br>(°C) | Sensor<br>response | Reference |
|-----------------------------------------------------------|-------------------------------------------|----------------------------------|--------------------|-----------|
| Ag-functionalized<br>SnO <sub>2</sub> microrod            | 0.1                                       | 200                              | 780                | This work |
| Co <sub>3</sub> O <sub>4</sub> -decorated<br>ZnO nanowire | 5                                         | 200                              | 45.4               | 1         |
| ZnO nanoparticles                                         | 40                                        | 290                              | 264                | 2         |
| Porous ZnO<br>nanoflakes                                  | 0.1                                       | 175                              | 5.6                | 3         |
| Nano-tubular TiO <sub>2</sub>                             | 50                                        | 300                              | 5                  | 4         |
| WO <sub>3</sub> nanorods                                  | 10                                        | 200                              | 209                | 5         |

#### Reference

- 1 C. W. Na, H.-S. Woo, I.-D. Kim and J.-H. Lee, *Chem. Commun.*, 2011, **47**, 5148.
- 2 S. Bai, J. Hu, D. Li, R. Luo, A. Chen and C. C. Liu, *J. Mater. Chem.*, 2011, **21**, 12288.
- 3 M. Chen, Z. Wang, D. Han, F. Gu, G. Guo, *J. Phys. Chem. C*, 2011, **115**, 12763.
- 4 Y. Gönüllü, G. C. M. Rodríguez, B. Saruhan, M. Ürgen, *Sens. Actuators B: Chem.*, 2012, **169**, 151.
- 5 S. Bai, K. Zhang, R. Luo, D. Li, A. Chen and C. C. Liu, *J. Mater. Chem.*, 2012, **22**, 12643.

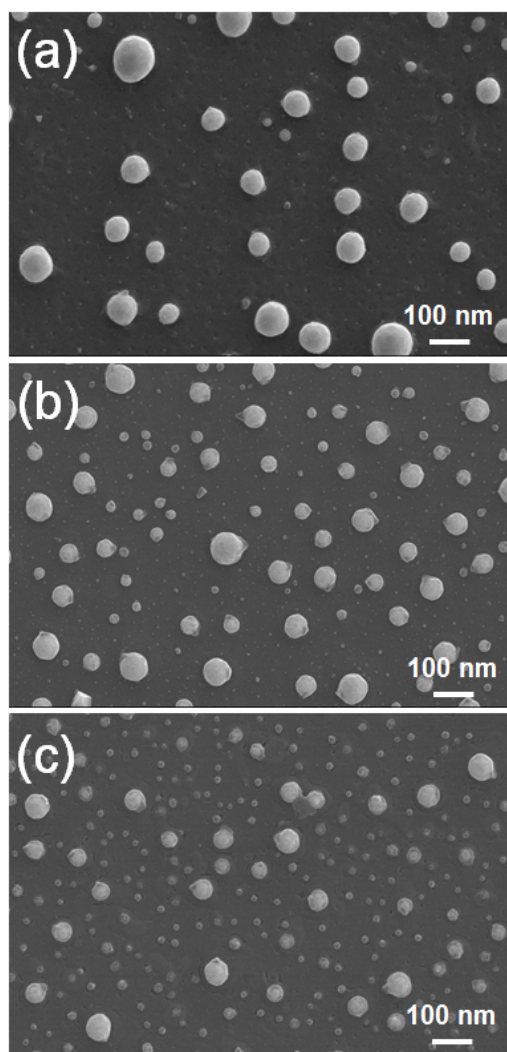

**Fig. S1** Microstructures of Ag nanoparticles synthesized with different  $\text{AgNO}_3$  concentrations in  $\gamma$ -ray radiolysis at  $10 \text{ kGy} \cdot \text{h}^{-1}$  for 2 h: (a)  $2 \times 10^{-2}$ , (b)  $2 \times 10^{-3}$  and (c)  $2 \times 10^{-4} \text{ mM}$   $\text{AgNO}_3$  in a mixed solvent of deionized water (90 vol%) and 2-propanol (10 vol%).

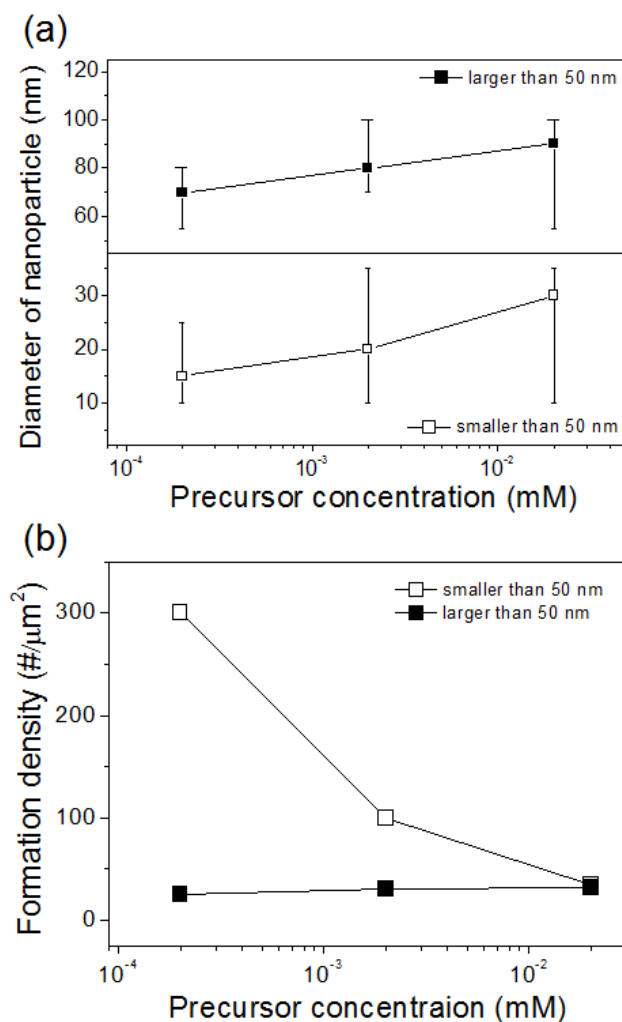

**Fig. S2** (a) Size and (b) formation density of Ag nanoparticles as a function of the precursor concentration in  $\gamma$ -ray radiolysis at  $10 \text{ kGy}\cdot\text{h}^{-1}$  for 2 h.

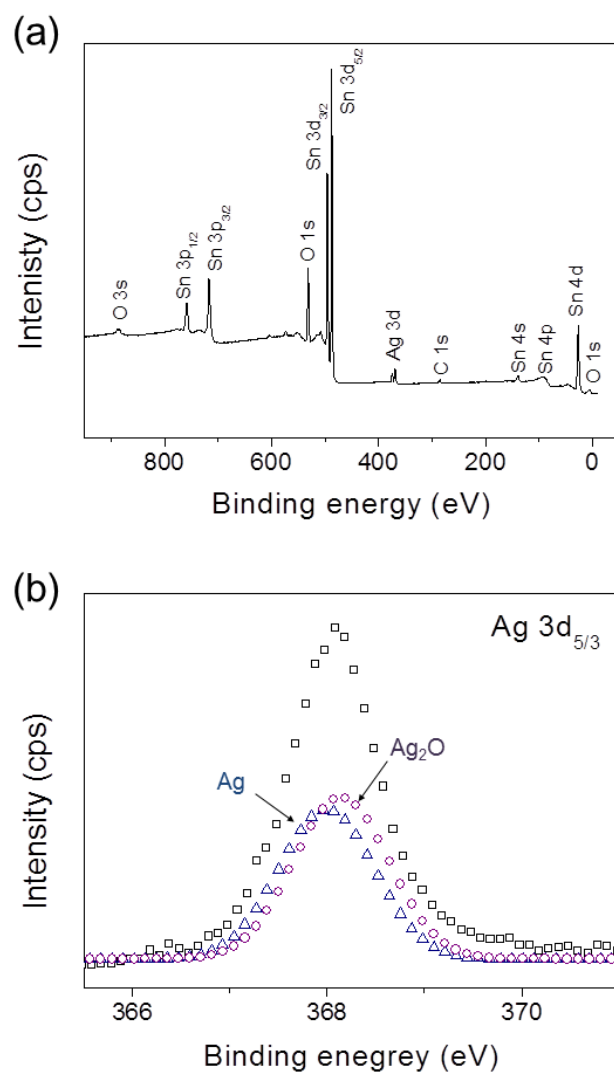

**Fig. S3** (a) X-ray photoelectron spectroscopy spectrum of the Ag-functionalized SnO<sub>2</sub> microrods after the heat treatment. (b) A high resolution spectrum for the Ag 3d<sub>5/2</sub> signal.

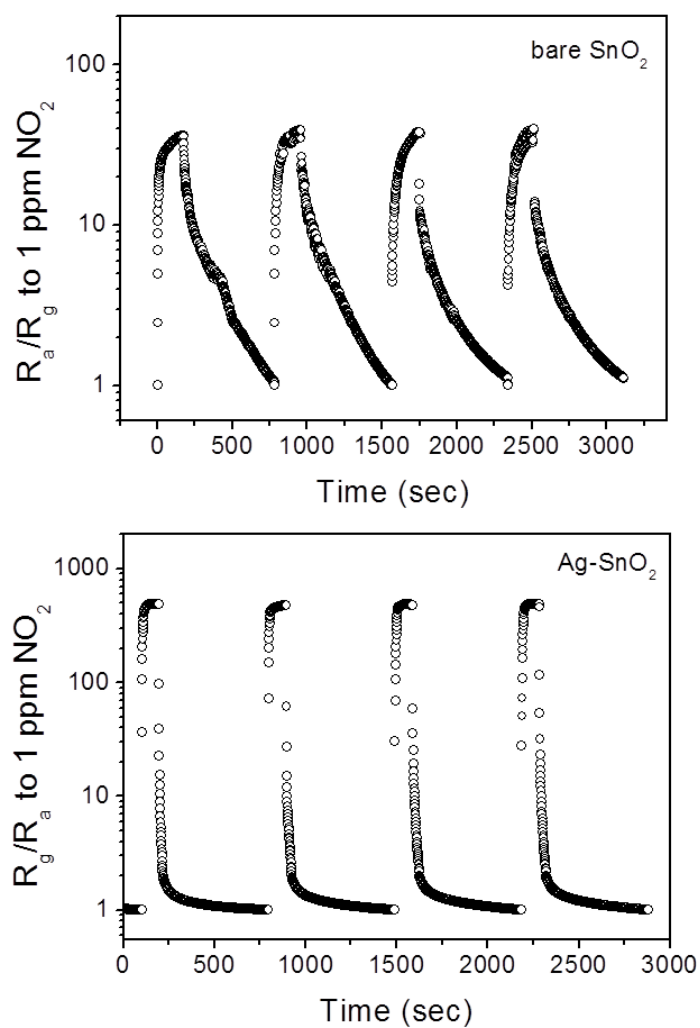

**Fig. S4** Response curves of the sensors fabricated with bare and Ag-functionalized SnO<sub>2</sub> microrods for 1 ppm NO<sub>2</sub> at 300 °C during the repeated cycles.

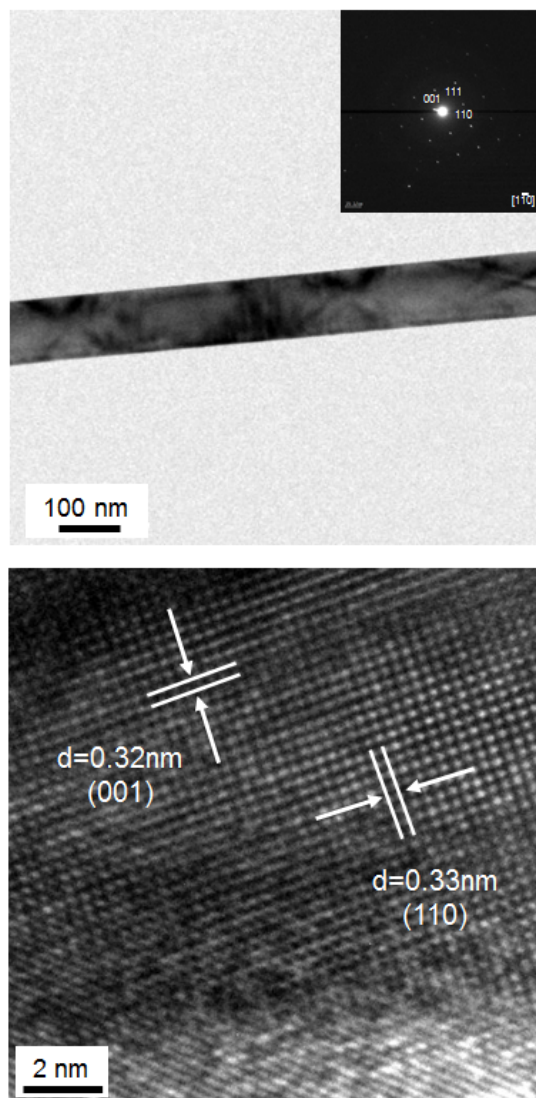

**Fig. S5** Low- and high-resolution TEM images taken from single SnO<sub>2</sub> microrod. The inset in the upper figure is an electron diffraction pattern taken from the nanorod.

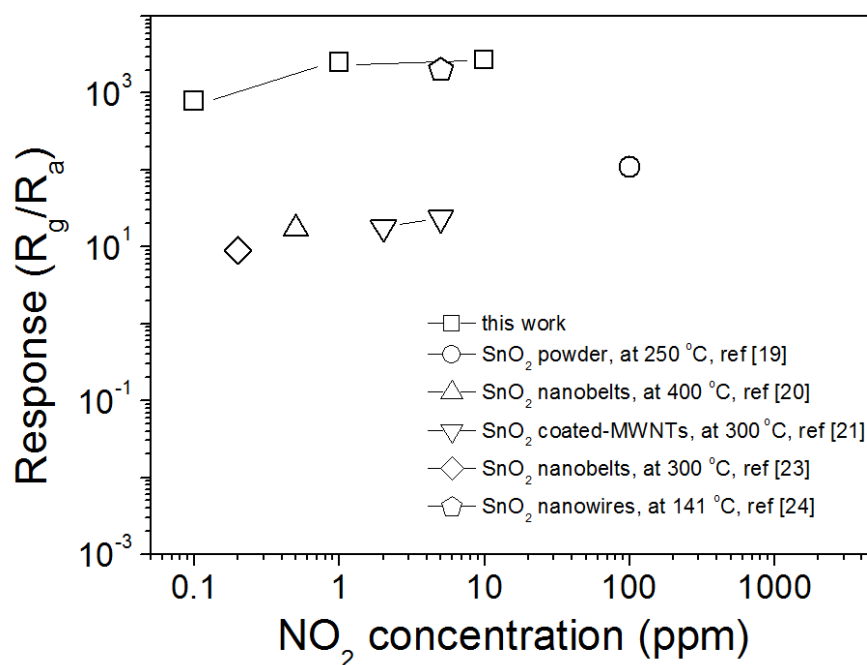

**Fig. S6** Comparison of the response of the sensor fabricated with the Ag-functionalized  $\text{SnO}_2$  microrods to those of previously reported sensors that were fabricated with different types of  $\text{SnO}_2$  materials.

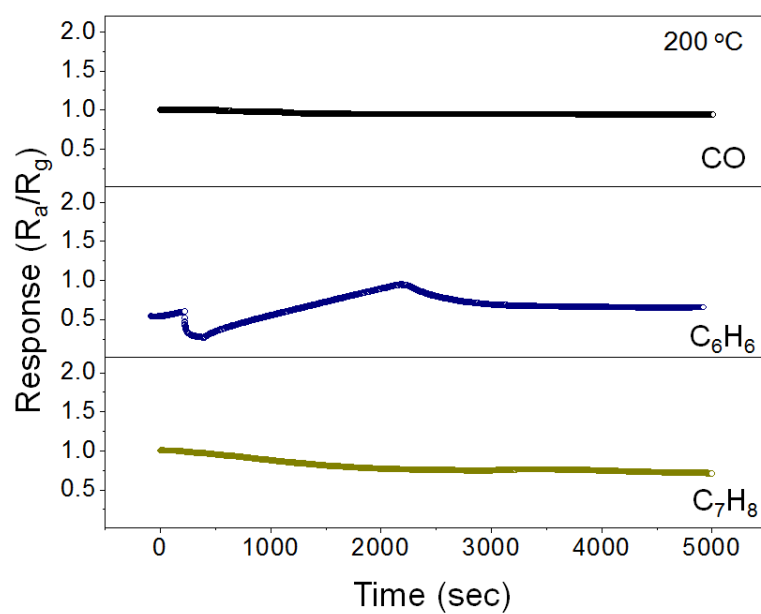

**Fig. S7** Response curves of the Ag-functionalized  $SnO_2$  nanorods for 100 ppm CO,  $C_6H_6$  and  $C_7H_8$  at 200 °C.

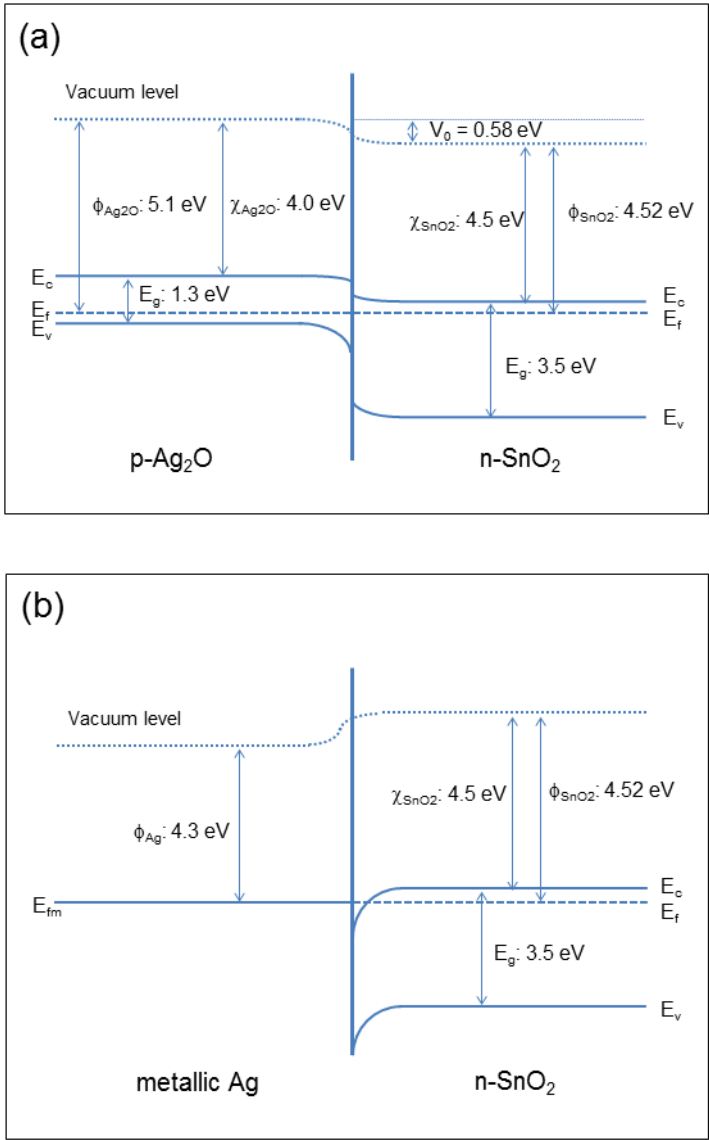

**Fig. S8** Energy band diagrams of the junctions (a) *p*-Ag<sub>2</sub>O and *n*-SnO<sub>2</sub> and (b) Ag and *n*-SnO<sub>2</sub>.
